# Supplementary material for: IL-17 down-regulates the immunosuppressive capacity of olfactory ecto-mesenchymal stem cells in murine collagen-induced arthritis
Source: PubMed Central journal article supplement (PMC5189999; doi:10.18632/oncotarget.10261), 2016-06-23
Supplement: oncotarget-07-42953-s001.pdf [file oncotarget-07-42953-s001.pdf]

## IL-17 down-regulates the immunosuppressive capacity of olfactory ecto-mesenchymal stem cells in collagen-induced arthritis

### Supplementary Material

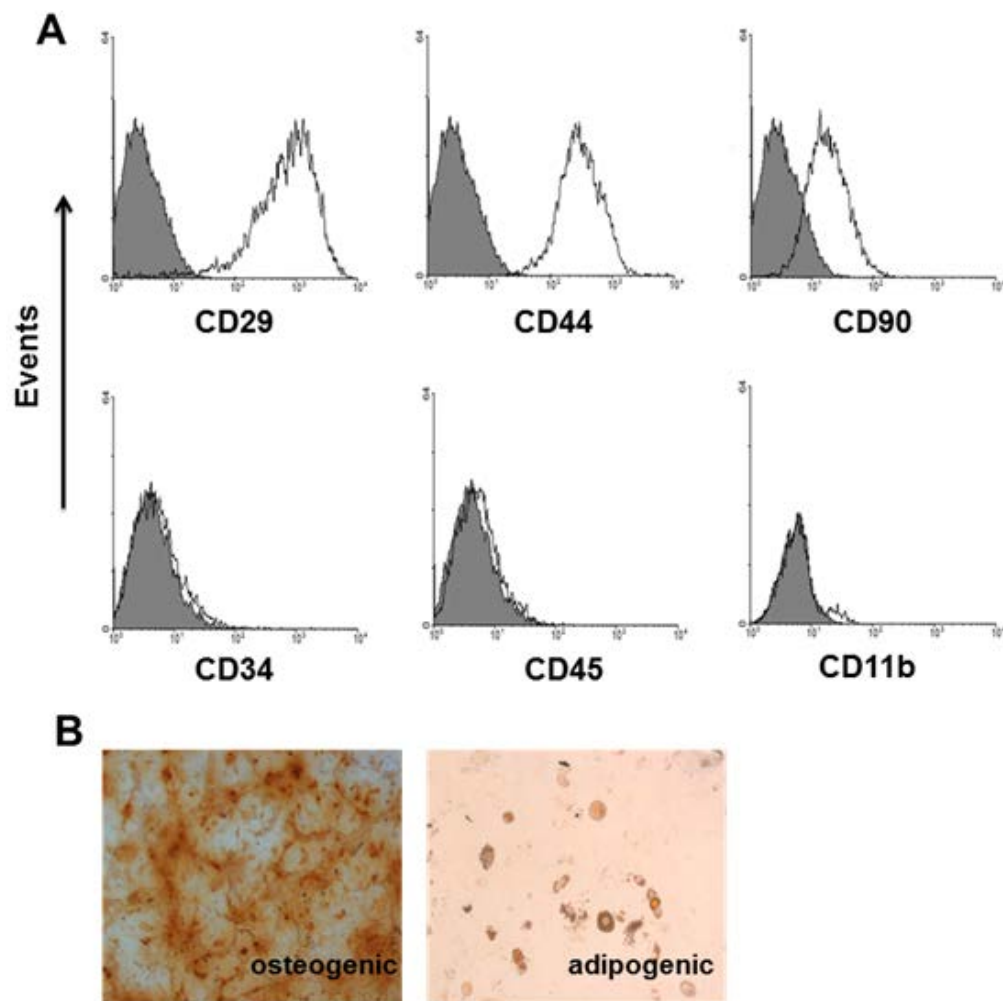

**Supplementary Figure S1: Phenotypic and functional characterization of OE-MSCs.** **A.** Flow cytometric analysis of surface-marker expression on OE-MSCs, including representative MSC markers CD29, CD44 and CD90, hematopoietic cell markers CD34 and CD45 and myeloid cell marker CD11b. **B.** OE-MSCs were

cultured in osteogenic/adipocytes conditions for 14/21 days, followed by alizarin red staining (left panel) or oil red O (right panel), respectively (original magnification  $\times$  10). Results are representative of three independent experiments.
